# Supplementary material for: Food Additives, a Key Environmental Factor in the Development of IBD through Gut Dysbiosis
Source: MDPI journal article supplement (doi:10.3390/microorganisms10010167), 2022-01-13
Supplement: s1 [file s1]

**Table S1.** Search strategy performed on 27<sup>th</sup> October 2021

| <b>MEDLINE</b>          | <b>Search terms</b>                                                                                                                                                                                                                                                                                                                                                                                                           | <b>Results</b> |
|-------------------------|-------------------------------------------------------------------------------------------------------------------------------------------------------------------------------------------------------------------------------------------------------------------------------------------------------------------------------------------------------------------------------------------------------------------------------|----------------|
| <b>#1</b>               | ibd OR (Inflammatory AND bowel AND disease*) OR (Crohn* AND disease*) OR (ulcerative* AND colitis*)                                                                                                                                                                                                                                                                                                                           | 137,251        |
| <b>#2</b>               | microbiota OR (gut AND microbiota) OR microbiome OR (intestinal AND flora)                                                                                                                                                                                                                                                                                                                                                    | 110,750        |
| <b>#3</b>               | (Artificial AND food AND additive*) OR (Artificial AND sweeteners) OR (Polyol*) OR (Acesulfame AND potassium) OR Aspartame OR Saccharin OR Sucralose OR Cyclamate OR Neotame OR Emulsifier* OR (Carboxymethyl AND cellulose) OR (Polysorbate AND 80) OR (Food AND color*)OR (Food AND preservative*) OR (Benzoic AND acid) OR (Sodium AND benzoate) OR (Titanium AND dioxide) OR (Sodium AND nitrite) OR (Food AND additive*) | 151,005        |
| <b>#1 AND #2 AND #3</b> |                                                                                                                                                                                                                                                                                                                                                                                                                               | <b>276</b>     |
| <b>WEB OF SCIENCE</b>   | <b>Search terms</b>                                                                                                                                                                                                                                                                                                                                                                                                           | <b>Results</b> |
| <b>#1</b>               | ibd OR (Inflammatory AND bowel AND disease*) OR (Crohn* AND disease*) OR (ulcerative* AND colitis*)                                                                                                                                                                                                                                                                                                                           | 173,061        |
| <b>#2</b>               | microbiota OR (gut AND microbiota) OR microbiome OR (intestinal AND flora)                                                                                                                                                                                                                                                                                                                                                    | 129,185        |
| <b>#3</b>               | (Artificial AND food AND additive*) OR (Artificial AND sweeteners) OR (Polyol*) OR (Acesulfame AND potassium) OR Aspartame OR Saccharin OR Sucralose OR Cyclamate OR Neotame OR Emulsifier* OR (Carboxymethyl AND cellulose) OR (Polysorbate AND 80) OR (Food AND color*)OR (Food AND preservative*) OR (Benzoic AND acid) OR (Sodium AND benzoate) OR (Titanium AND dioxide) OR (Sodium AND nitrite) OR (Food AND additive*) | 274,716        |
| <b>#1 AND #2 AND #3</b> |                                                                                                                                                                                                                                                                                                                                                                                                                               | <b>307</b>     |
| <b>SCOPUS</b>           | <b>Search terms</b>                                                                                                                                                                                                                                                                                                                                                                                                           | <b>Results</b> |
| <b>#1</b>               | ibd OR (Inflammatory AND bowel AND disease*) OR (Crohn* AND disease*) OR (ulcerative* AND colitis*)                                                                                                                                                                                                                                                                                                                           | 168,821        |
| <b>#2</b>               | microbiota OR (gut AND microbiota) OR microbiome OR (intestinal AND flora)                                                                                                                                                                                                                                                                                                                                                    | 126,655        |
| <b>#3</b>               | (Artificial AND food AND additive*) OR (Artificial AND sweeteners) OR (Polyol*) OR (Acesulfame AND potassium) OR Aspartame OR Saccharin OR Sucralose OR Cyclamate OR Neotame OR Emulsifier* OR (Carboxymethyl AND cellulose) OR (Polysorbate AND 80) OR (Food AND color*)OR (Food AND preservative*) OR (Benzoic AND acid) OR (Sodium AND benzoate) OR (Titanium AND dioxide) OR (Sodium AND nitrite) OR (Food AND additive*) | 435,388        |
| <b>#1 AND #2 AND #3</b> |                                                                                                                                                                                                                                                                                                                                                                                                                               | <b>268</b>     |
